# Supplementary material
Source: PubMed Central journal article supplement (PMC5544169)
Supplement: EBM717978_supplementary_material.pdf [file EBM717978_supplementary_material.pdf]

Supplementary table 1 - List of the 136 Differentially Expressed Genes between HS and CTRL rats - Table shows for each gene: Ensembl GeneID, Gene\_Symbol, log2FC.Deseq2 and FDR.Deseq2 (logarithmic fold change expression and p-adjusted value according to DESeq2), log2FC.EdgeR and FDR.EdgeR (logarithmic fold change expression and p-adjusted value according to EdgeR), gene description.

| Ensembl_GeneID       | Gene_Symbol    | log2FC.Deseq2 | FDR.Deseq2 | log2FC.EdgeR | FDR.EdgeR | Gene description                                                                                        |
|----------------------|----------------|---------------|------------|--------------|-----------|---------------------------------------------------------------------------------------------------------|
| ENSRNOG00000005935   | A3galt2        | 1.41          | 3.95E-03   | 1.95         | 2.55E-04  | alpha 1.3-galactosyltransferase 2                                                                       |
| ENSRNOG00000005955   | A630010A05Rik  | 3.56          | 8.77E-17   | 9.17         | 6.74E-32  | RIKEN cDNA A630010A05 gene                                                                              |
| ENSRNOG00000005986   | AABR07034730.2 | -1.42         | 1.26E-02   | -2.16        | 4.21E-03  | protein coding                                                                                          |
| ENSRNOG00000005983   | AABR07044635.1 | 0.71          | 3.12E-02   | 1.34         | 1.44E-03  | Novel lincRNA                                                                                           |
| ENSRNOG00000007637   | Acer2          | -0.93         | 1.30E-03   | -0.90        | 4.55E-03  | alkaline ceramidase 2                                                                                   |
| ENSRNOG00000012991   | Adgra2         | -0.81         | 9.21E-03   | -0.79        | 1.67E-02  | adhesion G protein-coupled receptor A2                                                                  |
| ENSRNOG00000011411   | Adrg6          | 1.37          | 3.35E-03   | 1.83         | 3.46E-04  | adhesion G protein-coupled receptor G6                                                                  |
| ENSRNOG00000002911   | Alb            | 2.89          | 4.13E-10   | 5.77         | 3.61E-14  | albumin                                                                                                 |
| ENSRNOG00000000907   | Alox5ap        | 0.88          | 9.10E-03   | 1.06         | 4.78E-03  | arachidonate 5-lipoxygenase activating protein                                                          |
| ENSRNOG000000026702  | Amica4         | -1.02         | 1.83E-03   | -1.04        | 3.48E-03  | adhesion molecule, interacts with CXADR antigen 1                                                       |
| ENSRNOG000000008837  | Ass1           | 1.50          | 6.39E-03   | 2.37         | 1.39E-04  | argininosuccinate synthase 1                                                                            |
| ENSRNOG000000002094  | Atg3           | 0.73          | 2.48E-02   | 0.89         | 1.16E-02  | autophagy related 3                                                                                     |
| ENSRNOG000000031598  | Atg9b4         | 0.84          | 1.95E-02   | 1.03         | 3.30E-03  | ATPase, class I, type 8B, member 4                                                                      |
| ENSRNOG000000032247  | Bank1          | -1.11         | 5.83E-03   | -1.21        | 2.84E-03  | B-cell scaffold protein with ankyrin repeats 1                                                          |
| ENSRNOG00000015514   | Bcat1          | 1.06          | 1.43E-02   | 1.37         | 2.29E-03  | branched chain amino acid transaminase 1, cytosolic                                                     |
| ENSRNOG00000016031   | Bicd2          | -0.89         | 5.85E-03   | -0.88        | 9.17E-03  | bicaudal D homolog 2 (Drosophila)                                                                       |
| ENSRNOG000000047800  | C5ar1          | 0.97          | 3.84E-02   | 1.28         | 3.28E-03  | complement component 5a receptor 1                                                                      |
| ENSRNOG000000002916  | Car4           | 0.98          | 2.08E-02   | 1.26         | 5.46E-03  | carbonic anhydrase 4                                                                                    |
| ENSRNOG000000003221  | Cas1           | 1.11          | 3.24E-02   | 1.61         | 1.15E-03  | chemokine (C-C motif) ligand 6                                                                          |
| ENSRNOG000000037331  | Cd33           | 0.71          | 4.76E-02   | 0.89         | 1.57E-02  | CD33 molecule                                                                                           |
| ENSRNOG000000011917  | Cd79b          | -1.12         | 8.71E-03   | -1.26        | 6.17E-03  | Cd79b molecule, immunoglobulin-associated beta                                                          |
| ENSRNOG00000010918   | Cebpa          | 1.09          | 4.15E-02   | 1.57         | 1.44E-03  | CCAAT/enhancer binding protein (C/EBP), alpha                                                           |
| ENSRNOG000000033564  | Cld            | 0.95          | 3.24E-02   | 1.22         | 2.41E-03  | complement factor D (adipsin)                                                                           |
| ENSRNOG000000027655  | Clec4b2        | 1.32          | 1.35E-07   | 1.51         | 1.45E-08  | C-type lectin domain family 4, member B2                                                                |
| ENSRNOG000000002611  | Clp2           | -0.83         | 6.29E-03   | -0.80        | 2.69E-02  | CAP-GLY domain containing linker protein 2                                                              |
| ENSRNOG000000008767  | Csrf7          | 0.85          | 1.67E-02   | 1.05         | 4.21E-03  | chemokine (C-X-C motif) receptor 6                                                                      |
| ENSRNOG000000014479  | Cttnbp2nl      | 0.90          | 4.22E-02   | 1.16         | 5.82E-03  | CTTNBP2 N-terminal like                                                                                 |
| ENSRNOG000000015029  | Dbt            | 1.18          | 1.32E-02   | 1.73         | 1.00E-02  | dihydrolipamide branched chain transacylase E2                                                          |
| ENSRNOG000000055562  | Dkc1           | -1.02         | 1.43E-02   | -1.10        | 1.04E-02  | dykerkerosis congenita 1, dyskerin                                                                      |
| ENSRNOG000000005061  | Dist           | 0.66          | 3.83E-02   | 0.81         | 2.88E-02  | dihydrolipamide S-succinyltransferase (E2 component of 2-oxo-glutarate complex)                         |
| ENSRNOG000000024905  | Drc1           | 1.18          | 1.51E-02   | 1.61         | 1.41E-03  | dynein regulatory complex subunit 1                                                                     |
| ENSRNOG000000033765  | Eif1           | 0.95          | 8.71E-03   | 1.16         | 2.32E-03  | eukaryotic translation initiation factor 1                                                              |
| ENSRNOG000000027855  | Fcgr1          | 1.06          | 1.38E-03   | 1.27         | 2.40E-04  | Fc fragment of IgA receptor                                                                             |
| ENSRNOG000000005932  | Fcrlb          | -0.97         | 2.18E-02   | -1.05        | 5.15E-02  | ficolin B                                                                                               |
| ENSRNOG000000034230  | Fcrl1          | -0.94         | 2.33E-02   | -1.00        | 2.11E-02  | Fc receptor-like 1                                                                                      |
| ENSRNOG000000021314  | Fdft1          | 0.73          | 4.82E-02   | 0.90         | 1.67E-02  | farnesyl diphosphate farnesyl transferase 1                                                             |
| ENSRNOG000000021021  | Ffar2          | 1.09          | 2.03E-02   | 1.44         | 9.58E-04  | free fatty acid receptor 2                                                                              |
| ENSRNOG000000001420  | Fis1           | 0.82          | 1.25E-02   | 0.98         | 6.87E-03  | fission, mitochondrial 1                                                                                |
| ENSRNOG000000018076  | Fmo5           | 1.00          | 1.57E-02   | 1.26         | 9.58E-04  | fawn containing monooxygenase 5                                                                         |
| ENSRNOG000000051056  | Fmo6           | 1.26          | 2.18E-02   | 1.93         | 2.91E-03  | fibrinectin type III domain containing 4                                                                |
| ENSRNOG000000002923  | Fmo6b          | -0.86         | 3.46E-02   | -0.89        | 4.47E-02  | FERM domain containing 6                                                                                |
| ENSRNOG000000060561  | Gdpd1          | 0.88          | 5.85E-03   | 1.05         | 1.11E-03  | glycerophosphodiester phosphodiesterase domain containing 1                                             |
| ENSRNOG000000018599  | Gga2           | -1.02         | 3.45E-03   | -1.04        | 4.78E-03  | golgi associated, gamma adaptin ear containing, ARF binding protein 2                                   |
| ENSRNOG000000047697  | Ggt1           | 1.12          | 1.04E-04   | 1.31         | 2.70E-06  | gamma-glutamyltransferase 1                                                                             |
| ENSRNOG000000001313  | Gnaz           | -0.81         | 5.30E-03   | -0.78        | 3.54E-02  | guanine nucleotide binding protein (G protein), alpha z polypeptide                                     |
| ENSRNOG000000038540  | Gp5            | -0.94         | 1.63E-02   | -0.98        | 1.61E-02  | glycoprotein V (platelet)                                                                               |
| ENSRNOG000000003816  | Gprmb          | 1.85          | 1.03E-04   | 2.63         | 1.23E-07  | glycoprotein (transmembrane) nmb                                                                        |
| ENSRNOG000000002834  | Gprh4          | 1.34          | 3.45E-03   | 1.57         | 1.27E-02  | interleukin 1 beta                                                                                      |
| ENSRNOG000000016122  | Hmgcr          | 0.69          | 3.42E-02   | 0.85         | 1.96E-02  | 3-hydroxy-3-methylglutaryl-CoA reductase                                                                |
| ENSRNOG000000001270  | Hcnr1          | -1.10         | 3.78E-02   | -1.41        | 3.26E-02  | hydrogen voltage-gated channel 1                                                                        |
| ENSRNOG000000031420  | Hyal2          | 1.31          | 9.48E-03   | 1.81         | 8.36E-05  | hyaluronoglucosaminidase 2                                                                              |
| ENSRNOG000000013949  | Iah2           | -0.85         | 2.67E-02   | -0.88        | 3.84E-02  | isocitrate dehydrogenase 2 (NADP+), mitochondrial                                                       |
| ENSRNOG0000000034190 | Ighm           | -1.16         | 1.31E-03   | -1.23        | 3.54E-03  | immunoglobulin heavy constant mu                                                                        |
| ENSRNOG000000015027  | Il1br1         | 0.88          | 3.12E-02   | 1.11         | 6.28E-03  | interleukin 18 receptor 1                                                                               |
| ENSRNOG000000009749  | Il1b           | 1.34          | 3.45E-03   | 1.57         | 1.27E-02  | interleukin 1 beta                                                                                      |
| ENSRNOG000000014320  | Il1bba         | -1.36         | 3.17E-04   | -1.48        | 1.44E-04  | inhibin beta A                                                                                          |
| ENSRNOG000000001518  | Itga6          | -1.03         | 1.30E-04   | -1.01        | 1.14E-02  | integrin, alpha 6                                                                                       |
| ENSRNOG000000036762  | Itrp12         | 0.97          | 1.52E-02   | 1.20         | 7.99E-04  | inositol 1,4,5-trisphosphate receptor interacting protein-like 2                                        |
| ENSRNOG000000002618  | Irs1ap2        | 0.80          | 8.71E-03   | 0.95         | 3.91E-03  | influenza virus NS1A binding protein                                                                    |
| ENSRNOG000000042848  | Jam2           | 1.20          | 1.49E-02   | 1.62         | 9.58E-04  | junctional adhesion molecule 2                                                                          |
| ENSRNOG000000006118  | Klf10          | 1.14          | 1.14E-02   | 1.49         | 8.45E-04  | Kruppel-like factor 10                                                                                  |
| ENSRNOG000000002163  | Klf3           | 0.85          | 2.03E-02   | 1.03         | 4.27E-03  | Kruppel-like factor 3 (basic)                                                                           |
| ENSRNOG000000013742  | LARGE          | -0.85         | 1.65E-03   | -0.86        | 1.96E-02  | like-glycosyltransferase                                                                                |
| ENSRNOG000000009946  | Ldlr           | 1.18          | 1.30E-02   | 1.56         | 1.77E-03  | low density lipoprotein receptor                                                                        |
| ENSRNOG000000010645  | Lgals3         | 0.90          | 4.12E-03   | 1.07         | 1.57E-03  | lectin, galactoside-binding, soluble, 3                                                                 |
| ENSRNOG000000042776  | Lins           | 0.98          | 4.69E-02   | 1.33         | 3.90E-03  | lines homolog 1                                                                                         |
| ENSRNOG000000009401  | Lmo2           | -0.90         | 1.54E-02   | -0.93        | 1.51E-02  | LIM domain only 2                                                                                       |
| ENSRNOG000000009205  | Lmo4           | -0.81         | 4.50E-02   | -0.83        | 4.34E-02  | LIM domain only 4                                                                                       |
| ENSRNOG000000030812  | LOC100361105   | -1.22         | 1.70E-02   | -1.53        | 1.57E-03  | lgh protein-like                                                                                        |
| ENSRNOG000000005402  | LOC501110      | -1.11         | 2.53E-02   | -1.11        | 2.53E-02  | protein to Glutathione S-transferase A1 (GTH1) (HA subunit 1) (GST-epsilon) (GSTA1-1) (GST class-alpha) |
| ENSRNOG000000020399  | Ltb4           | 1.18          | 1.79E-02   | 1.62         | 9.86E-03  | leukotriene B4 receptor                                                                                 |
| ENSRNOG000000019264  | Ltr            | 1.09          | 7.65E-03   | 1.36         | 3.46E-04  | lymphotoxin beta receptor (TNFR superfamily, member 3)                                                  |
| ENSRNOG000000000137  | Ly86           | -0.98         | 3.86E-02   | -1.12        | 2.09E-02  | lymphocyte antigen 86                                                                                   |
| ENSRNOG000000003139  | Lyc2           | -1.26         | 4.37E-03   | -1.45        | 1.06E-03  | lysozyme C type 2                                                                                       |
| ENSRNOG000000019463  | Mad2l1bp       | -0.85         | 3.83E-02   | -0.88        | 4.78E-02  | MAD2L1 binding protein                                                                                  |
| ENSRNOG000000002848  | Maai           | 1.18          | 2.32E-02   | 1.69         | 9.59E-04  | monoamine oxidase A                                                                                     |
| ENSRNOG000000009249  | Mgap1          | 0.92          | 1.94E-04   | 1.06         | 1.72E-02  | mitogen activated protein kinase kinase kinase kinase 1                                                 |
| ENSRNOG000000024040  | Mb21d2         | -0.96         | 1.03E-02   | -1.00        | 2.72E-03  | Mab-21 domain containing 2                                                                              |
| ENSRNOG000000020945  | Ms4a1          | -0.98         | 1.17E-02   | -1.02        | 1.58E-02  | membrane-spanning 4-domains, subfamily A, member 1                                                      |
| ENSRNOG000000038047  | Mt1            | 1.34          | 1.64E-02   | 2.09         | 2.55E-04  | metallothionein 1                                                                                       |
| ENSRNOG000000043098  | Mt2A           | 2.14          | 1.51E-05   | 3.51         | 2.15E-08  | metallothionein 2A                                                                                      |
| ENSRNOG000000009001  | Mtss1          | -0.81         | 3.00E-03   | -0.78        | 1.61E-02  | metastasis suppressor 1                                                                                 |
| ENSRNOG000000042912  | Mycbpap        | -1.72         | 5.47E-04   | -2.31        | 3.46E-04  | Mycbp associated protein                                                                                |
| ENSRNOG000000002196  | Ndrb9          | 0.81          | 2.37E-02   | 0.99         | 4.50E-03  | nucleoside diphosphate linked moiety X-type motif 9                                                     |
| ENSRNOG000000000417  | Nkx2-1         | -0.92         | 2.84E-02   | -0.93        | 3.72E-02  | nuclear mitotic apparatus protein 1                                                                     |
| ENSRNOG000000017155  | Nck2           | -0.81         | 5.85E-03   | -0.78        | 4.36E-02  | NCK adaptor protein 1                                                                                   |
| ENSRNOG000000007393  | Ndrg1          | 1.79          | 3.44E-07   | 2.19         | 8.25E-11  | N-myc downstream regulated 1                                                                            |
| ENSRNOG000000011688  | Nel3           | 1.07          | 3.11E-02   | 1.43         | 1.67E-02  | nei-like DNA glycosylase 3                                                                              |
| ENSRNOG000000019907  | Nklike         | -1.19         | 1.48E-03   | -1.27        | 9.58E-04  | nuclear factor of kappa light polypeptide gene enhancer in B-cells inhibitor, epsilon                   |
| ENSRNOG000000052386  | Nlr1           | -1.21         | 3.88E-03   | -1.34        | 2.10E-03  | NLR family member X1                                                                                    |
| ENSRNOG000000012772  | Npqt           | 0.84          | 1.74E-02   | 1.03         | 3.06E-03  | NAD(P)H dehydrogenase, quinone 1                                                                        |
| ENSRNOG000000002176  | Nudat9         | 0.81          | 2.37E-02   | 0.99         | 4.50E-03  | nucleoside diphosphate linked moiety X-type motif 9                                                     |
| ENSRNOG000000000417  | Numa1          | -0.92         | 2.84E-02   | -0.93        | 3.72E-02  | nuclear mitotic apparatus protein 1                                                                     |
| ENSRNOG000000013280  | Olfm4          | 1.05          | 3.33E-03   | 1.28         | 5.46E-03  | olfactomedin 4                                                                                          |
| ENSRNOG000000018911  | Pfkfb3         | 0.96          | 2.86E-02   | 1.23         | 1.74E-03  | 6-phosphofructo-2-kinase/fructose-2,6-bisphosphatase 3                                                  |
| ENSRNOG000000053891  | Pfh1b          | -1.04         | 1.40E-04   | -1.02        | 2.05E-03  | PHD finger protein 11B                                                                                  |
| ENSRNOG000000012061  | Prkcb          | -0.92         | 3.33E-03   | -0.91        | 5.88E-03  | protein kinase C, beta                                                                                  |
| ENSRNOG000000000281  | Proth          | -1.11         | 3.87E-02   | -1.43        | 1.19E-02  | proline dehydrogenase (oxidase) 1                                                                       |
| ENSRNOG000000025184  | Prss35         | -1.16         | 1.46E-02   | -1.35        | 3.20E-03  | protease, serine, 35                                                                                    |
| ENSRNOG000000009829  | Psg2           | 0.92          | 2.64E-02   | 1.07         | 2.69E-02  | prostaglandin E receptor 2 (subtype EP2)                                                                |
| ENSRNOG000000013415  | Ptpn18         | -1.24         | 5.47E-04   | -1.31        | 8.79E-04  | protein tyrosine phosphatase, non-receptor type 18                                                      |
| ENSRNOG000000017093  | Pxd1           | -0.84         | 2.18E-02   | -0.85        | 3.35E-02  | PX domain containing 1                                                                                  |
| ENSRNOG000000021139  | RGD1311575     | -0.81         | 2.18E-02   | -0.79        | 3.86E-02  | hypothetical LOC289568                                                                                  |
| ENSRNOG000000032396  | RGD1559575     | -0.80         | 1.71E-02   | -0.78        | 4.67E-02  | similar to novel protein                                                                                |
| ENSRNOG0000000050000 | RGD1564318     | -1.14         | 1.24E-02   | -1.32        | 1.33E-02  | lambda-chain C1-region-like                                                                             |
| ENSRNOG0000000040121 | RGD1565158     | 2.43          | 7.10E-07   | 4.69         | 3.33E-15  | similar to RIKEN cDNA 4921537P18                                                                        |
| ENSRNOG000000021403  | Rhb            | -1.04         | 5.91E-03   | -1.55        | 3.75E-04  | ras homolog family member B                                                                             |
| ENSRNOG000000016123  | Rnf144b        | -1.08         | 5.30E-03   | -1.15        | 5.88E-03  | ring finger protein 144B                                                                                |
| ENSRNOG000000016416  | Rnh1           | 0.72          | 1.12E-02   | 0.86         | 8.47E-03  | ribonuclease/angiogenin inhibitor 1                                                                     |
| ENSRNOG000000000451  | RT1-Ba         | -1.28         | 1.77E-03   | -1.44        | 2.10E-03  | RT1 class II, locus Ba                                                                                  |
| ENSRNOG000000032844  | RT1-Da         | -1.08         | 1.63E-02   | -1.24        | 2.31E-02  | RT1 class II, locus Da                                                                                  |
| ENSRNOG000000003215  | RT1-Db1        | -1.08         | 8.71E-03   | -1.18        | 1.37E-02  | RT1 class II, locus Db1                                                                                 |
| ENSRNOG000000000795  | RT1-N3         | -1.31         | 1.65E-03   | -1.45        | 1.06E-03  | RT1 class II, locus N3                                                                                  |
| ENSRNOG000000000219  | Rtn1           | -1.04         | 1.43E-02   | -1.11        | 3.29E-02  | retinoblastoma motif containing 9-like                                                                  |
| ENSRNOG000000006526  | Sema3c         | 1.31          | 4.24E-03   | 1.72         | 1.60E-04  | sema domain, immunoglobulin domain (Ig), short basic domain, secreted, (semaphorin) 3C                  |
| ENSRNOG000000011815  | Sgk1           | -1.38         | 1.69E-03   | -1.57        | 1.94E-03  | serum/glucocorticoid induced regulated kinase 1                                                         |
| ENSRNOG000000002069  | Slc35a5        | 0.95          | 7.75E-03   | 1.15         | 9.90E-04  | solute carrier family 35, member A5                                                                     |
| ENSRNOG000000028703  | Slc39a6        | -0.92         | 1.37E-02   | -0.94        | 2.04E-02  | solute carrier family 39 (zinc transporter), member 6                                                   |
| ENSRNOG000000003476  | Slc6a4         | -0.96         | 1.77E-03   | -0.95        | 6.51E-03  | solute carrier family 6 (neurotransmitter transporter), member 4                                        |
| ENSRNOG000000000172  | Sgrrd          | 1.02          | 5.83E-03   | 1.24         | 9.58E-04  | sulfide quinone reductase-like (yeast)                                                                  |
| ENSRNOG000000008910  | Swap70         | -1.18         | 1.18E-03   | -1.25        | 9.58E-04  | SWAP switching B-cell complex 70                                                                        |
| ENSRNOG000000018960  | Tcf1           | -1.21         | 1.12E-03   | -1.25        | 3.12E-03  | specific repeat containing nuclear envelope protein 1                                                   |
| ENSRNOG0000000061403 | Tlr3           | 1.60          | 1.24E-09   | 1.84         | 5.15E-10  | tolllike receptor 3                                                                                     |
| ENSRNOG000000004249  | Tlr7           | -1.04         | 9.65E-03   | -1.11        | 5.07E-03  | tolllike receptor 7                                                                                     |
| ENSRNOG0000000049517 | Tnfrap3        | -1.39         | 1.47E-03   | -1.59        | 1.44E-03  | tumor necrosis factor, alpha-induced protein 3                                                          |
| ENSRNOG000000012422  | Tnk1           | -0.83         | 1.64E-02   | -0.83        | 4.36E-02  | TRAF2 and NCK interacting kinase                                                                        |
| ENSRNOG000000059344  | Tpcn1          | -0.75         | 1.11E-02   | -0.71        | 4.32E-02  | two pore segment channel 1                                                                              |
| ENSRNOG000000048914  | Traf1          | -1.35         | 6.06E-06   | -1.40        | 5.73E-06  | TNF receptor-associated factor 1                                                                        |
| ENSRNOG000000022939  | Tsc2           | 0.95          | 3.20E-02   | 1.23         | 3.29E-03  | tuberous sclerosis containing 2, E3 ubiquitin protein ligase                                            |
| ENSRNOG000000056135  | Tsc22d3        | 0.69          | 2.35E-02   | 0.84         | 2.21E-02  | TSC22 domain family, member 3                                                                           |
| ENSRNOG000000051620  | Tspan9         | -0.86         | 1.61E-02   |              |           |                                                                                                         |
